# Supplementary material
Source: HighWire-hosted journal article supplement (https://bmjopen.bmj.com/content/14/1/e076039)
Supplement: inline-supplementary-material-3 [file inline-supplementary-material-3.pdf]

**Supplementary table 1**  
Key measures and timing of assessments.

|               | Day -7 | Day 0* | Day 3 | Day 4 | Day 7 | Day 14 | Week 4 | Week 8 | Week 24 | Week 52 |
|---------------|--------|--------|-------|-------|-------|--------|--------|--------|---------|---------|
| IDS-SR        |        | X      | X     | X     | X     | X      | X      | X      | X       | X       |
| KSS           |        |        | X     | X     |       |        |        |        |         |         |
| HDRS-6        |        | X      |       |       | X     | X      | X      | X      | X       | X       |
| GAD-7         |        | X      |       |       | X     | X      | X      | X      | X       | X       |
| ISI           |        | X      |       |       | X     | X      | X      | X      | X       | X       |
| Actigraphy    | X      | X      | X     | X     | X     | X      | X      | X      | X       | X       |
| Sleep diaries | X      | X      | X     | X     | X     | X      | X      | X      | X       | X       |
| rMEQ          |        | X      |       |       |       |        |        | X      |         |         |
| SETS          |        | X      |       |       |       |        |        |        |         |         |
| PSEN          |        |        |       |       |       |        | X      |        |         |         |
| WSAS          |        | X      |       |       | X     | X      | X      | X      | X       | X       |
| EQ-5D-5L      |        | X      |       |       | X     | X      | X      | X      | X       | X       |
| Demographics  |        | X      |       |       |       |        |        |        |         |         |

\*Baseline assessments at day 0 will be conducted prior to randomization.

Abbreviations: IDS-SR – Inventory of Depressive Symptomatology, Self-Report; KSS – Karolinska Sleepiness Scale; HDRS-6 – Hamilton Depression Rating Scale, 6 item version; GAD-7 – Generalized Anxiety Disorder; ISI – Insomnia Severity Index; rMEQ - Brief Horne-Östberg Morningness-Eveningness Questionnaire; SETS – Stanford Expectations of Treatment Scale; WSAS – Work and Social Adjustment Scale; PSEN – Patient Satisfaction and experienced negative effects.
